# Supplementary material for: Tantalum complexes with all nitrogen coordination sphere: mixed amido-, imido-, guanidinato complexes of tantalum and their thermal behaviour
Source: Royal Society of Chemistry journal article supplement (doi:10.1039/b503988f), 2005-01-01
Supplement: b503988f.pdf [file b503988f.pdf]

## Supplementary Information

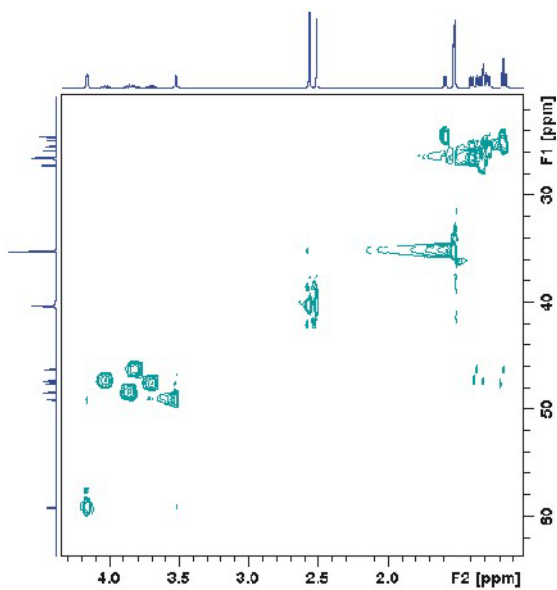

2-D HMQC – spectrum of Compound 1 (C<sub>6</sub>D<sub>6</sub>, RT)

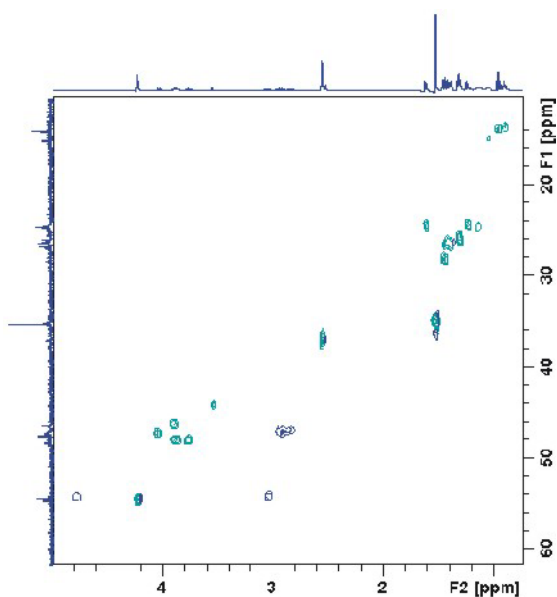

2-D HMQC – spectrum of Compound 2 (C<sub>6</sub>D<sub>6</sub>, RT)

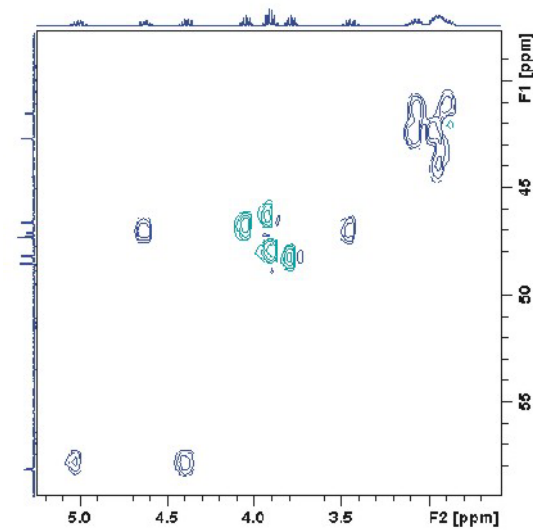

2-D HMQC – spectrum of Compound 3 (C<sub>6</sub>D<sub>6</sub>, RT)

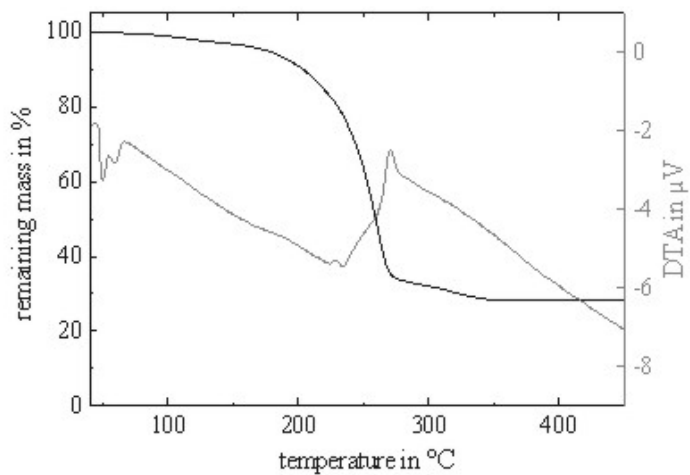

TG/DTA – spectrum of Compound 1  
(Heating Rate 5°C/min, N<sub>2</sub>-flow 300ml min<sup>-1</sup>)

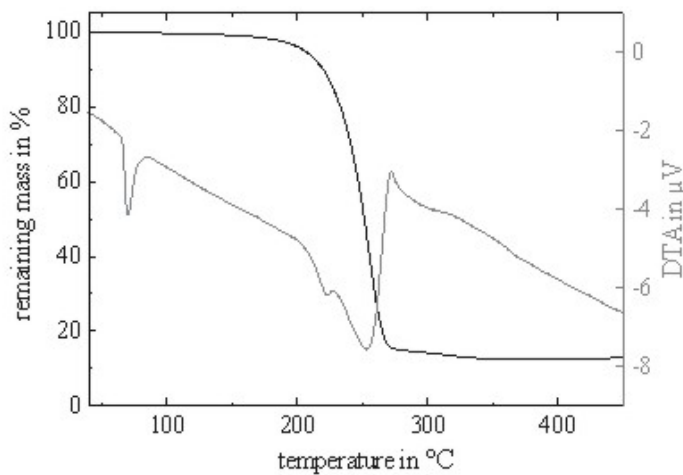

TG/DTA – spectrum of Compound 2  
(Heating Rate 5°C/min, N<sub>2</sub>-flow 300ml min<sup>-1</sup>)

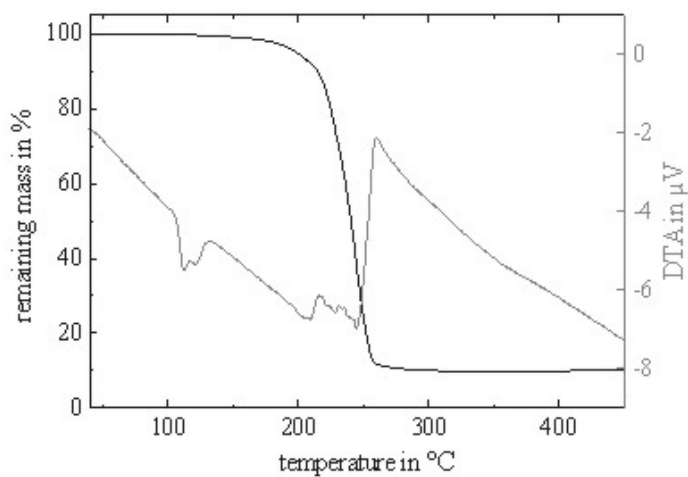

TG/DTA – spectrum of Compound 3  
(Heating Rate 5°C/min, N<sub>2</sub>-flow 300ml min<sup>-1</sup>)
